# Supplementary material
Source: publisher figshare collection journal article supplement (https://springernature.figshare.com/ndownloader/files/19887542)
Supplement: Supplementary file 1 [file 19887542]

**Additional file 3**

**Sample Task**

**The Lottery (Shortened to meet word limits)**

**Section A**

Arrange the following sentences according to their sequence in the story.

1. They greeted one another and exchanged bits of gossip as they went to join their husbands.

2. The villagers pronounced this name "Dellacroy"--eventually made a great pile of stones in one corner of the square and guarded it against the raids of the other boys.

3. The feeling of liberty sat uneasily on most of them.

**Section B**

**Complete the following sentences.**

4. Tessie Hutchinson said, “it is not fair” because ……………………………….

5. There was a stir when the crowd saw the black spot on the slip because ………….

6. Nancy and Bill Jr. laughed after they opened their slip because……………….

**Section C**

**Answer the following questions.**

7. Why is the black box described as "battered"?

8. How do you describe Ms. Hutchinson?

9. What do you feel about Bill Hutchinson?
